# Supplementary material for: Monitoring of cellular behaviors by microcavity array-based single-cell patterning
Source: Royal Society of Chemistry journal article supplement (doi:10.1039/c3an01698f), 2013-11-04
Supplement: c3an01698f.pdf [file c3an01698f.pdf]

## 1 SUPPLEMENTARY DATA

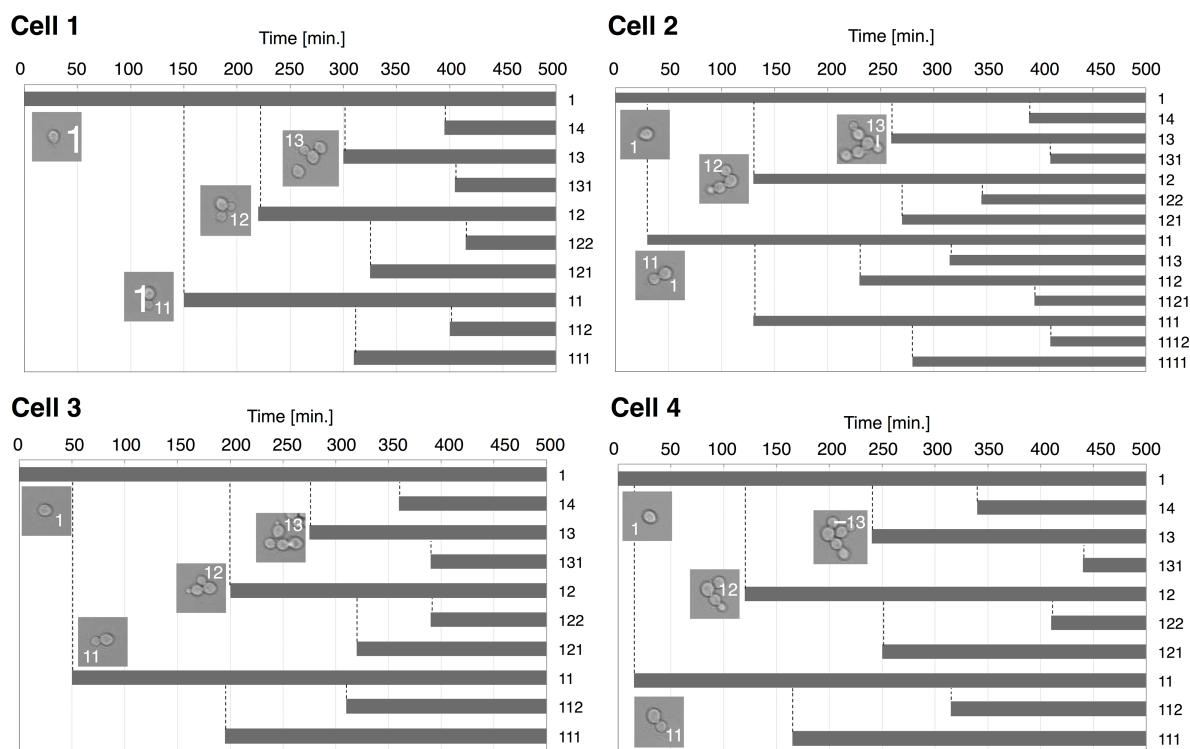

2

3 Supplementary Figure S1: Dynamic lineage maps of single yeast cells. Dash lines indicate the  
4 time points of cell division. Cell 1-4 indicate arbitrarily selected cells from patterned cells.

5

6 Supplementary Video 1: Time-lapse imaging of yeast cells. The movie was captured at 5 min  
7 intervals and played at 10 frames/second.

8

9 Supplementary Video 2: Time-lapse imaging of diatom cells. The movie was captured at 30  
10 min intervals and played at 10 frames/second.

11

12 Supplementary Video 3: 3D images of chloroplasts of diatom cells patterned on agarose gel.
